# Supplementary material for: Osmanicin, a Polyketide Alkaloid Isolated from Streptomyces osmaniensis CA-244599 Inhibits Elastase in Human Fibroblasts
Source: PubMed Central journal article supplement (PMC6630352; doi:10.3390/molecules24122239), 2019-06-15
Supplement: molecules-24-02239-s001.pdf [file molecules-24-02239-s001.pdf]

## SUPPORTING INFORMATION

### **Osmanicin, a Polyketide Alkaloid Isolated from *Streptomyces osmaniensis* CA-244599 inhibits Elastase in Human Fibroblasts**

**Mamdouh N. Samy<sup>1</sup>, Géraldine Le Goff<sup>1</sup>, Philippe Lopes<sup>1</sup>, Katerina Georgousaki<sup>2</sup>, Sentiljana Gumeni<sup>3</sup>, Celso Almeida<sup>4</sup>, Ignacio González<sup>4</sup>, Olga Genilloud<sup>4</sup>, Ioannis Trougakos<sup>3</sup>, Nikolas Fokialakis<sup>2</sup> and Jamal Ouazzani<sup>1,\*</sup>**

<sup>1</sup> Institut de Chimie des Substances Naturelles ICSN, Centre National de la Recherche Scientifique, Avenue de la Terrasse 91198, Gif-sur-Yvette, France.

<sup>2</sup> Department of Pharmacognosy & Natural Products Chemistry, Faculty of Pharmacy, National and Kapodistrian University of Athens, Athens 15771 Greece.

<sup>3</sup> Department of Cell Biology and Biophysics, Faculty of Biology, National and Kapodistrian University of Athens, Athens, Greece

<sup>4</sup> Fundación MEDINA, Parque Tecnológico de Ciencias de la Salud, 18016 Granada, Spain.

## Table of contents

**Figure S1.**  $^1\text{H}$  NMR (300 MHz,  $\text{CD}_3\text{OD}$ ) spectrum of compound **1**

**Figure S2.**  $^{13}\text{C}$  NMR (75 MHz,  $\text{CD}_3\text{OD}$ ) spectrum of compound **1**

**Figure S3.** HSQC (300 MHz,  $\text{CD}_3\text{OD}$ ) spectrum of compound **1**

**Figure S4.** HMBC (300 MHz,  $\text{CD}_3\text{OD}$ ) spectrum of compound **1**

**Figure S5.**  $^1\text{H}$ - $^1\text{H}$  COSY (300 MHz,  $\text{CD}_3\text{OD}$ ) spectrum of compound **1**

**Figure S6.**  $^1\text{H}$ - $^1\text{H}$  ROESY (500 MHz,  $\text{CD}_3\text{OD}$ ) spectrum of compound **1**

**Figure S7.** HRESIMS of compound **1**

**Figure S8.** IR spectrum of compound **1**

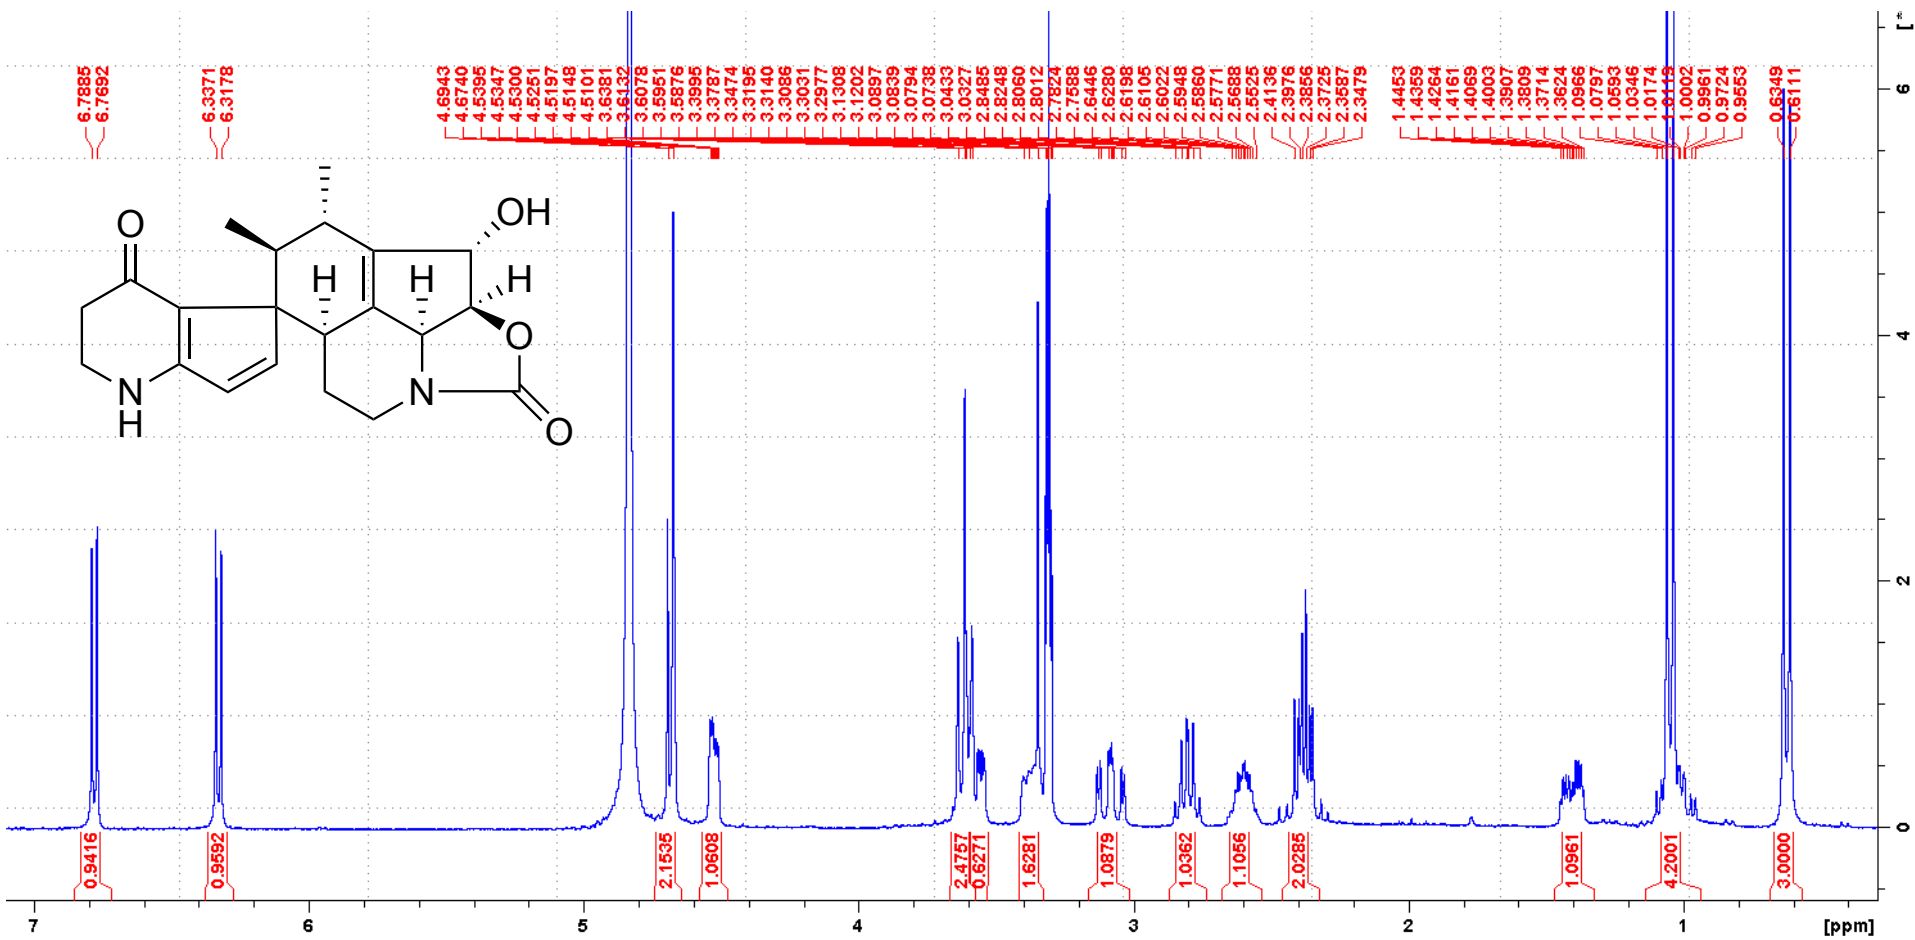

Figure S1. <sup>1</sup>H NMR (300 MHz, CD<sub>3</sub>OD) spectrum of compound 1

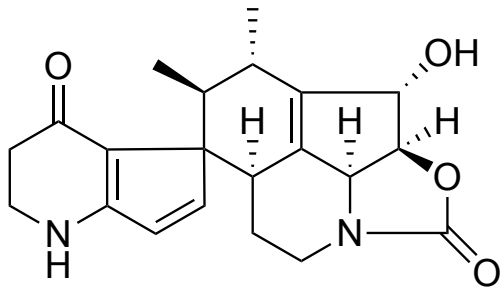

C13-UDEFT-2k MeOD /opt/topspin2.8 Ouazzani 34

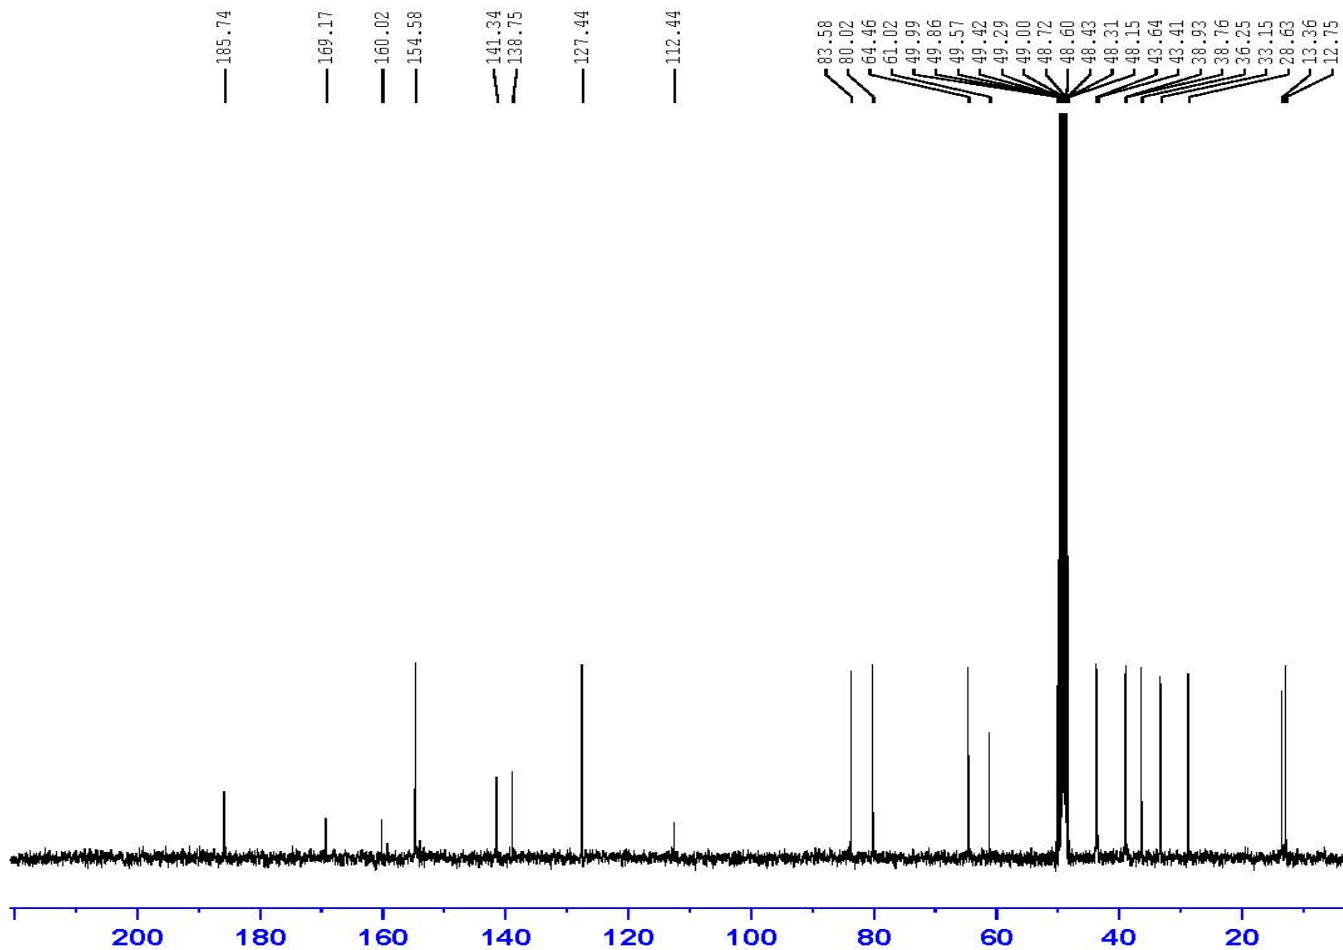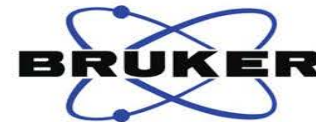

```

Current Data Parameters
NAME      S Chart F AE C-3
EXPNO    2
PROCNO   1

F2 - Acquisition Parameters
Date_    20170210
Time     16.09
INSTRUM  spect
PROBHD   5 mm PABBO BB-
PULPROG  udef1
TD       12946
SOLVENT  MeOD
NS       2048
DS       4
SWH      17985.611 Hz
FIDRES   1.389279 Hz
AQ       0.3598988 sec
RG       1149.4
DW       27.800 usec
DE       6.50 usec
TE       300.0 K
D1       2.00000000 sec
D11      0.03000000 sec
D12      0.00002000 sec
D20      20.00000000 sec
TD0      1

===== CHANNEL f1 =====
NUC1     13C
P1       9.00 usec
P2       2000.00 usec
P26      500.00 usec
PL1      -0.30 dB
SFO1     75.4853543 MHz
SP2      8.77 dB
SP8      8.77 dB
SPNAM[2] Crp60comp.4
SPNAM[8] Crp60,0.5,20.1
SFOAL2   0.500
SFOALS   0.500
SPOFFS2  0 Hz
SPOFFS8  0 Hz

===== CHANNEL f2 =====
CPDPRG[2] waltz16
NUC2     1H
PCPD2   80.00 usec
PL2     3.80 dB
PL12    20.00 dB
SFO2    300.1721012 MHz

F2 - Processing parameters
SI       32768
SF       75.4776892 MHz
WDW      EM
SSB      0
LB       2.00 Hz
GB       0
PC       1.40
  
```

Figure S1. <sup>13</sup>C NMR (300 MHz, CD<sub>3</sub>OD) spectrum of compound 1

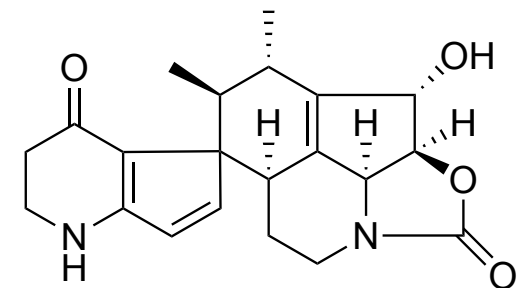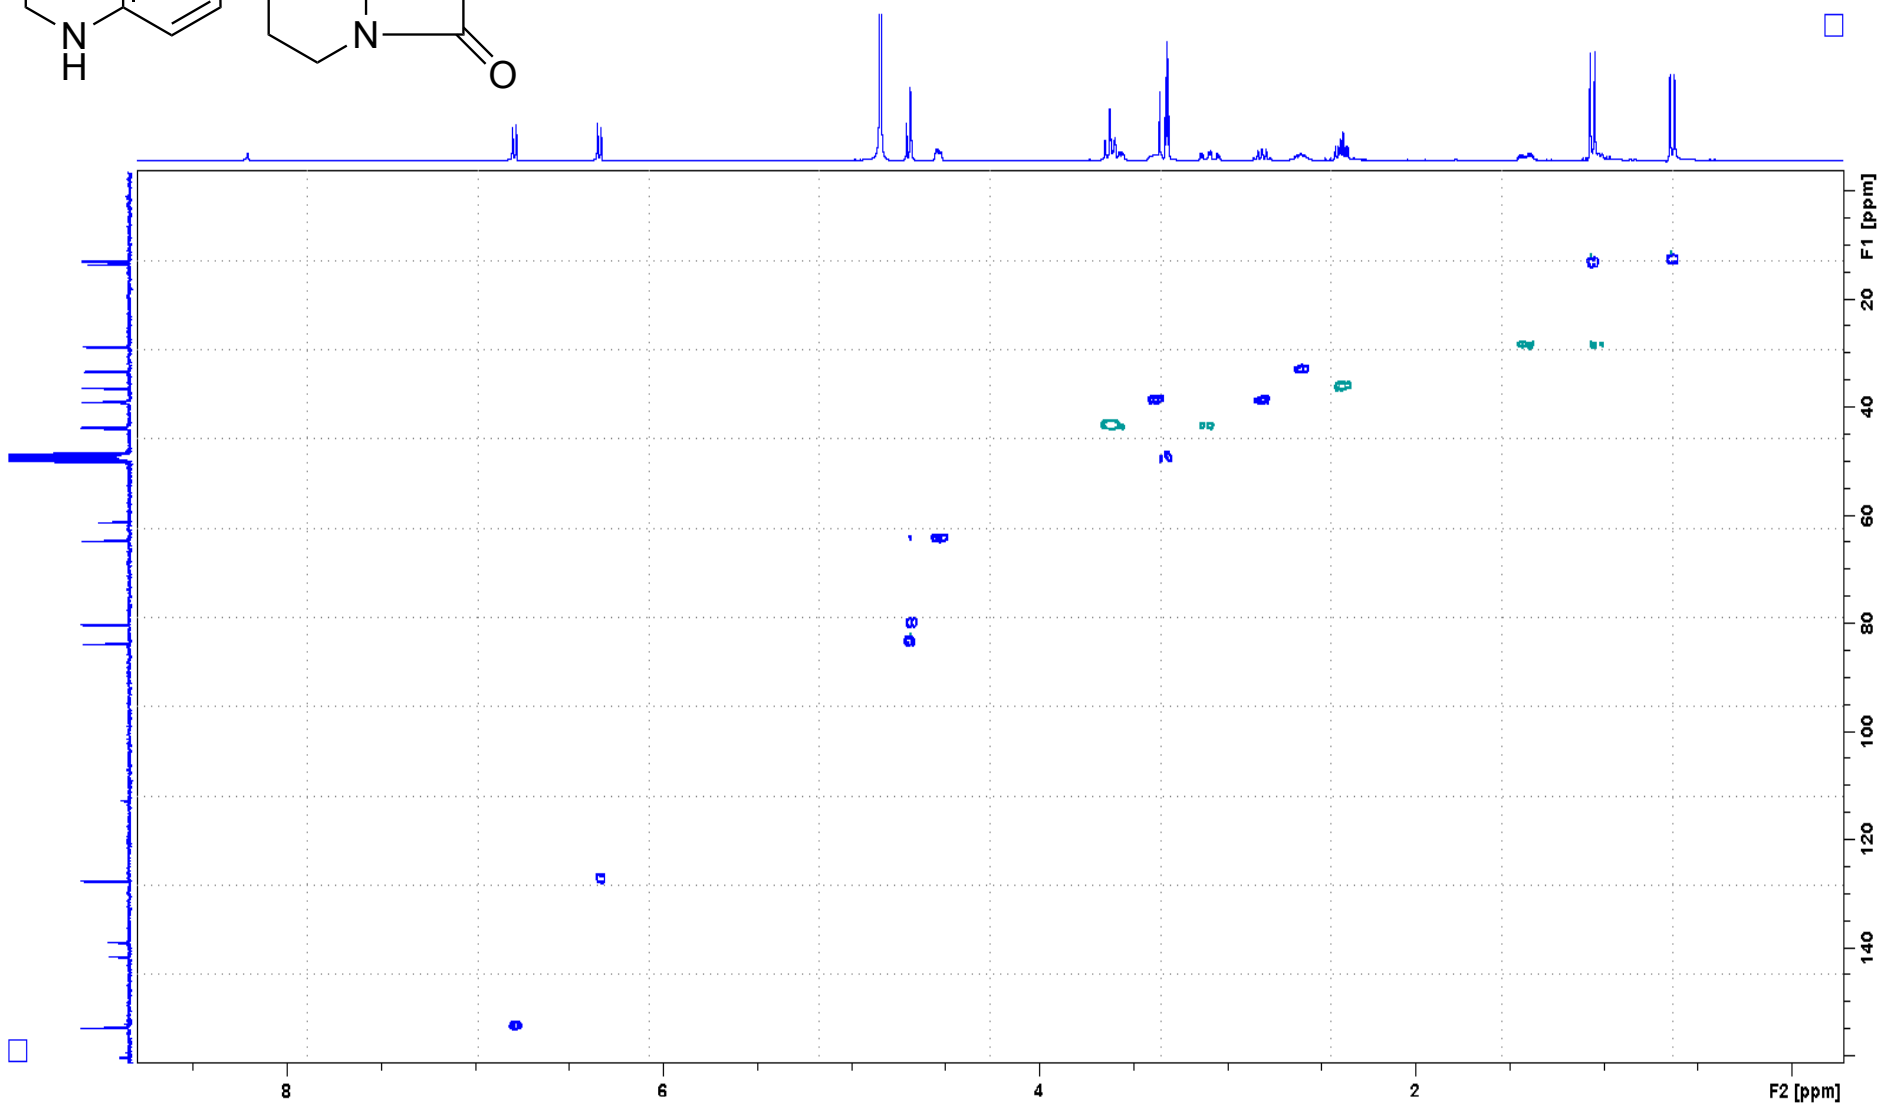

Figure S3. HSQC (300 MHz, CD<sub>3</sub>OD) spectrum of compound 1

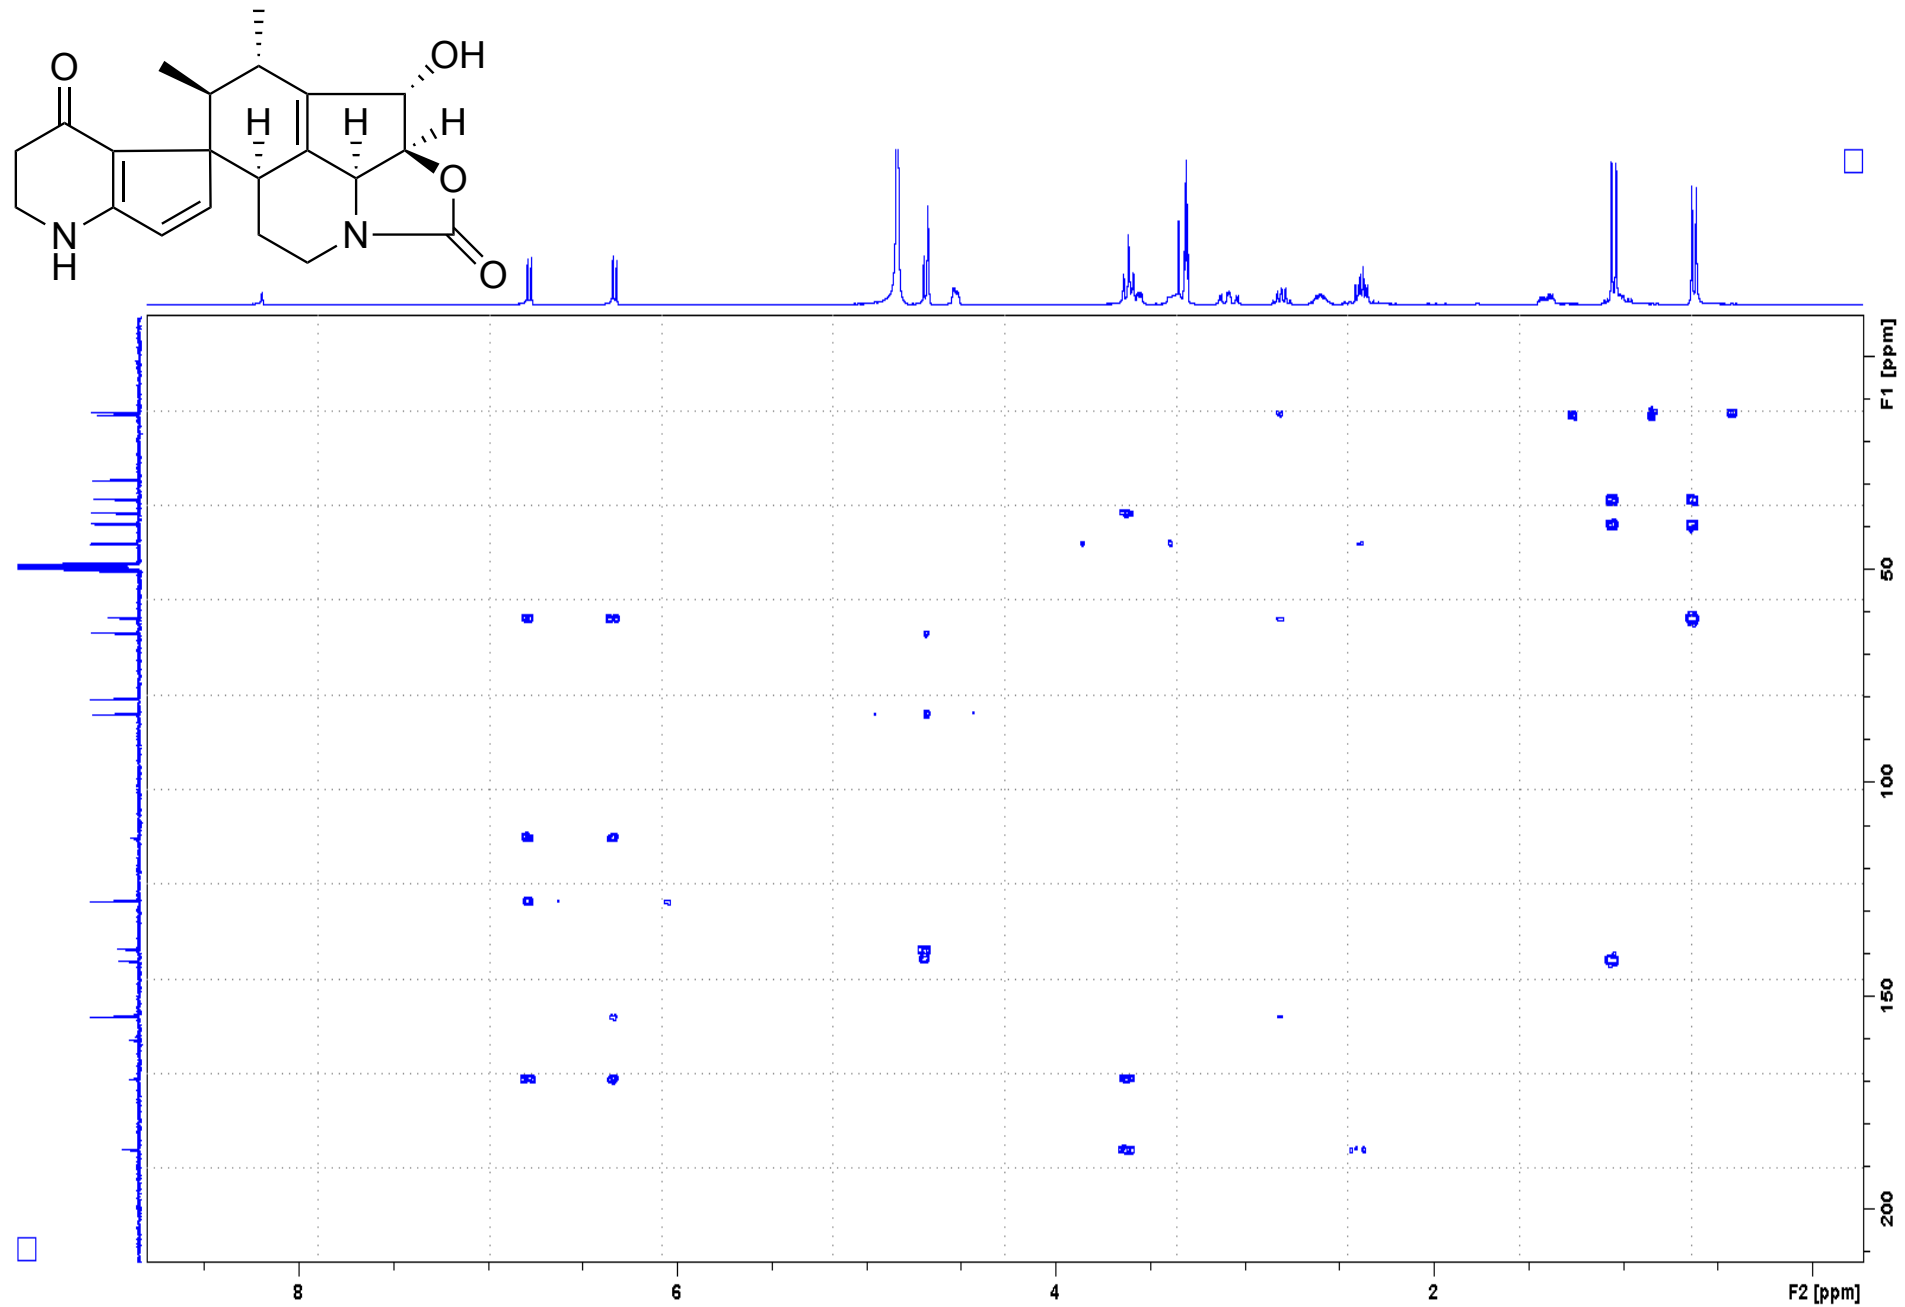

Figure S4. HMBC (300 MHz, CD<sub>3</sub>OD) spectrum of compound 1

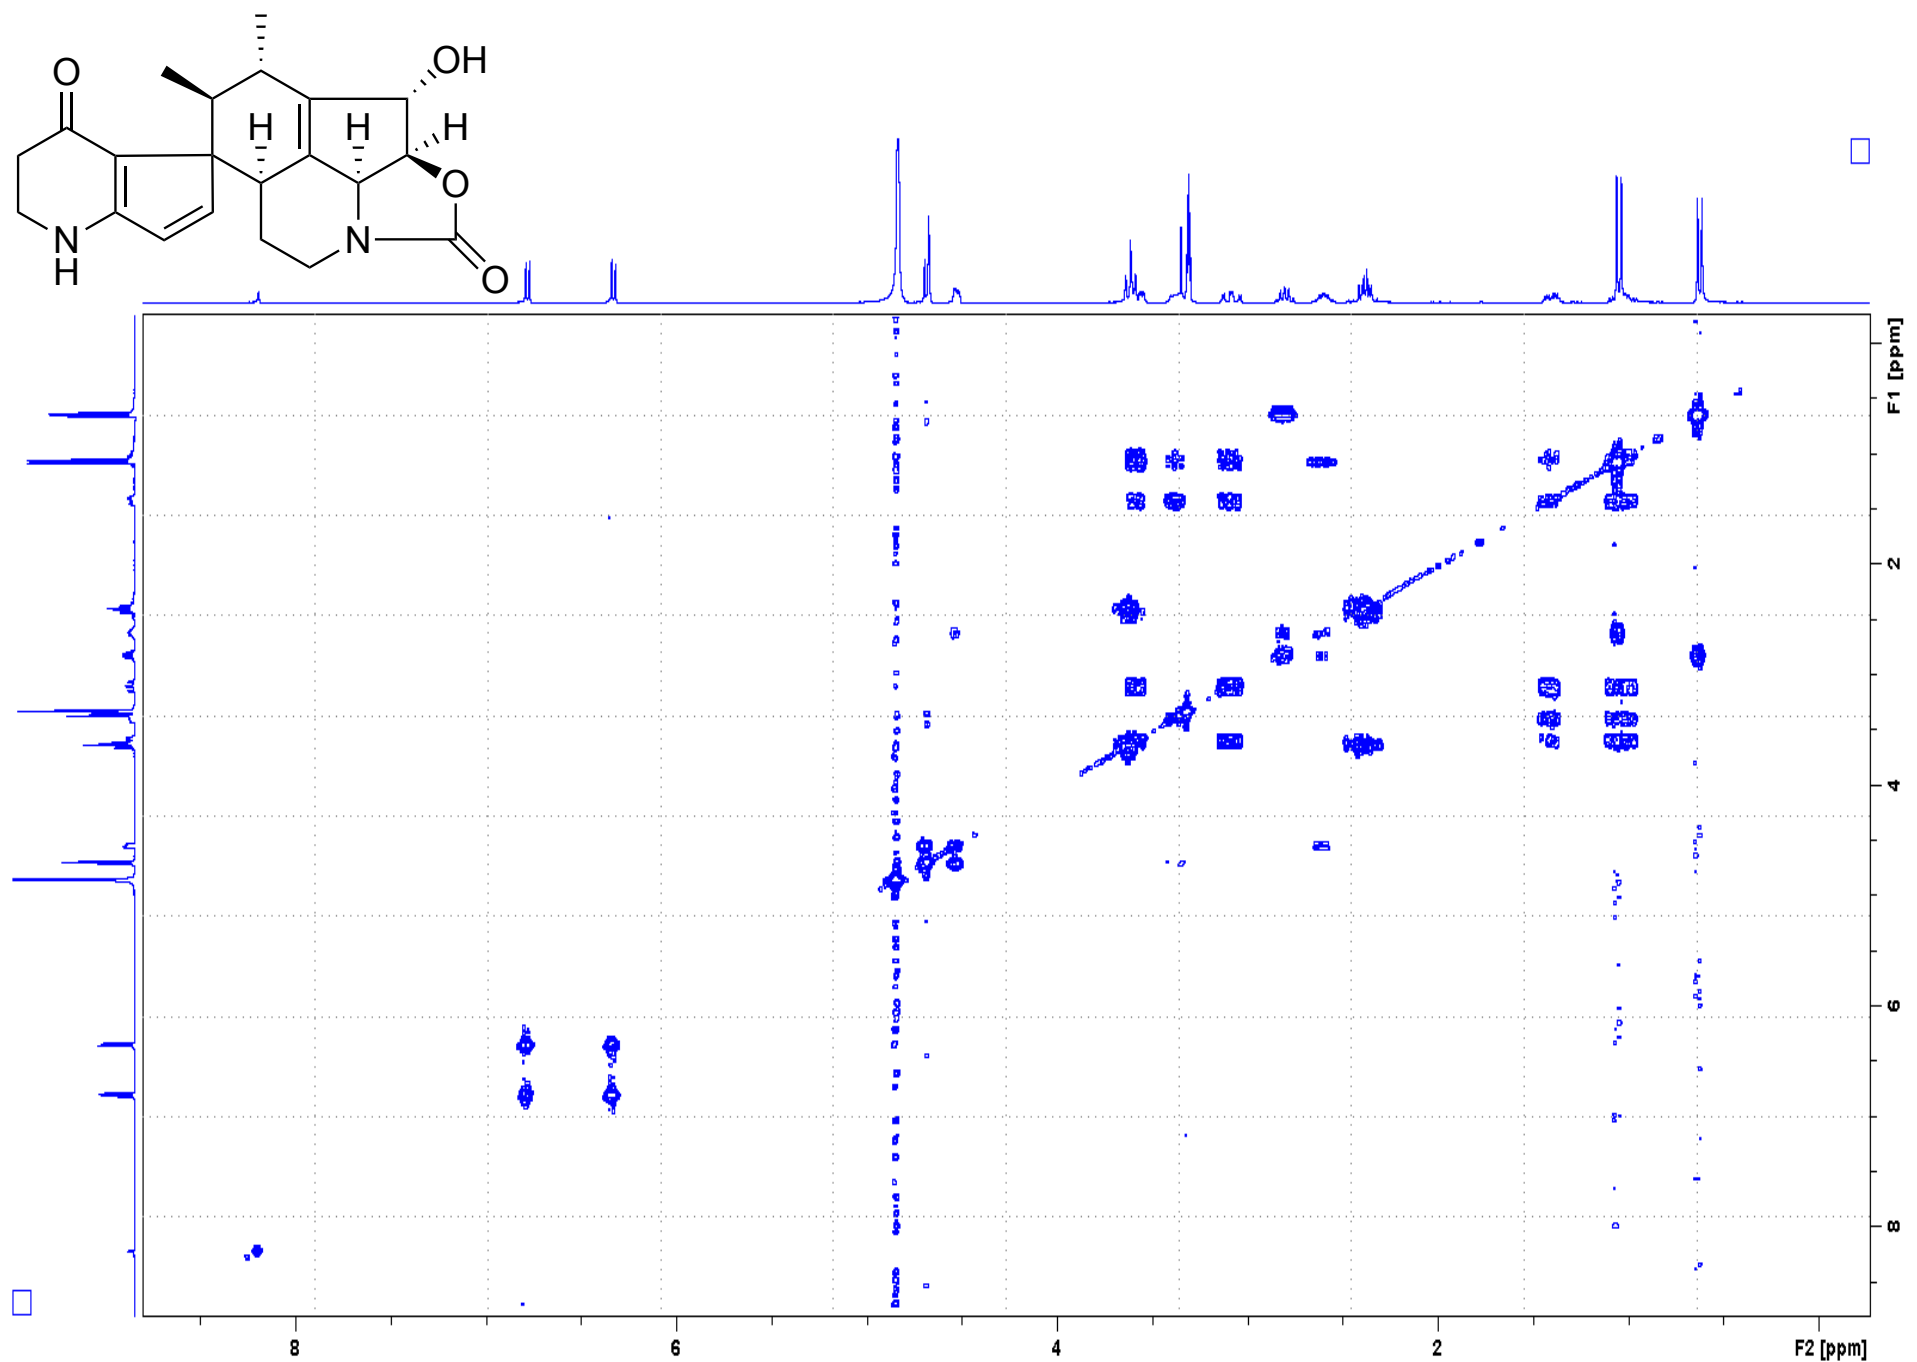

Figure S5. COSY (300 MHz, CD<sub>3</sub>OD) spectrum of compound 1

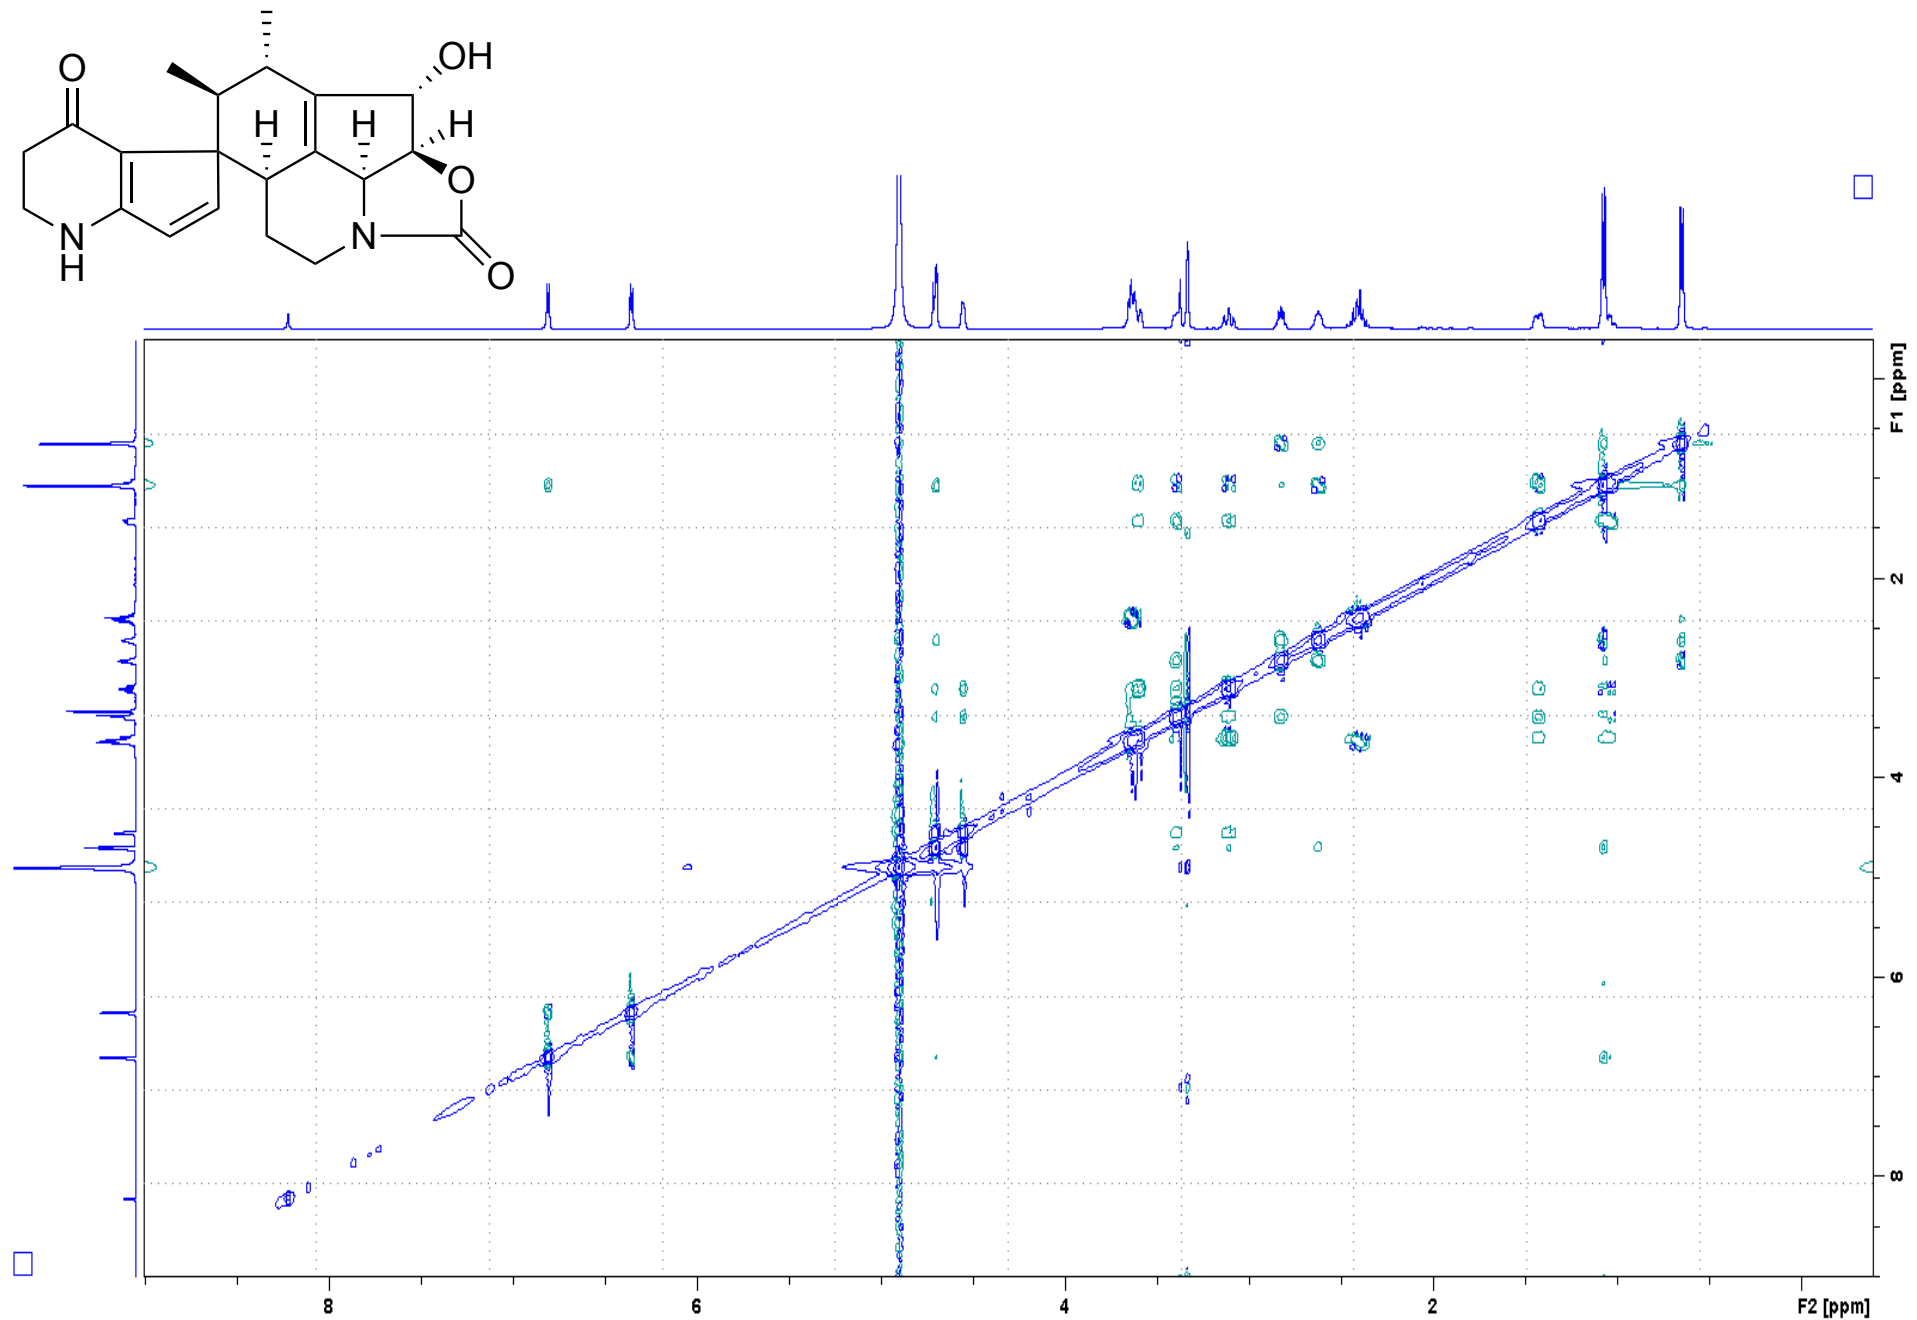

**Figure S6.** ROESY (500 MHz, CD<sub>3</sub>OD) spectrum of compound 1



## Elemental Composition Report

### Single Mass Analysis

Tolerance = 10.0 PPM / DBE: min = -1.5, max = 100.0

Element prediction: Off

Number of isotope peaks used for i-FIT = 9

Monoisotopic Mass, Even Electron Ions

917 formula(e) evaluated with 11 results within limits (all results (up to 1000) for each mass)

Elements Used:

C: 0-100 H: 0-120 N: 0-10 O: 0-10 Na: 0-1

08-Feb-2017 17:38:49

1: TOF MS ES+

LCT Premier XE KE483

OUAZZANI\_eskandar4-3 27 (0.698)

2.13e+004

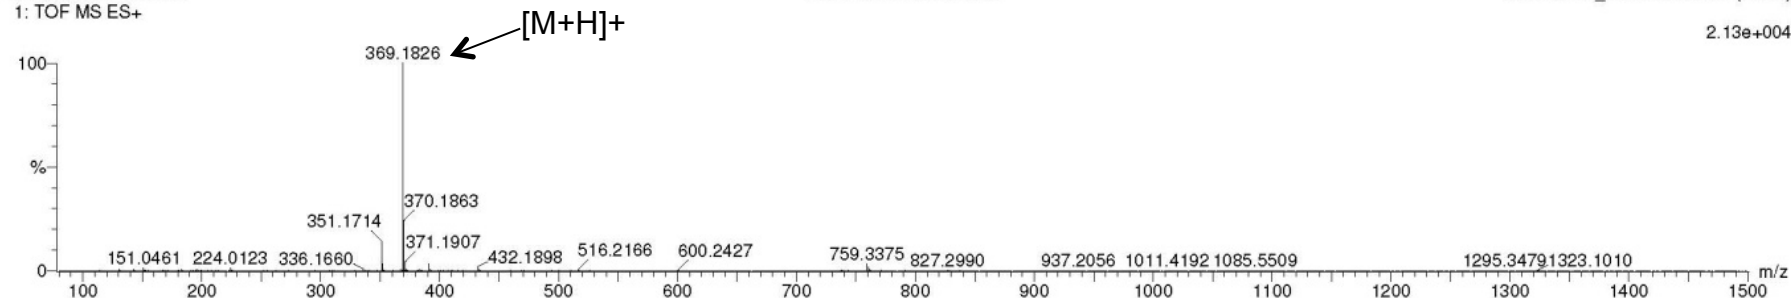

Minimum: -1.5  
Maximum: 5.0 10.0 100.0

| Mass     | Calc. Mass | mDa  | PPM  | DBE  | i-FIT | i-FIT (Norm) | Formula          |
|----------|------------|------|------|------|-------|--------------|------------------|
| 369.1826 | 369.1828   | -0.2 | -0.5 | 15.5 | 417.6 | 3.5          | C22 H21 N6       |
|          | 369.1822   | 0.4  | 1.1  | -0.5 | 426.9 | 12.8         | C8 H26 N8 O7 Na  |
|          | 369.1831   | -0.5 | -1.4 | 11.5 | 416.6 | 2.5          | C24 H26 O2 Na    |
|          | 369.1814   | 1.2  | 3.3  | 10.5 | 414.2 | 0.2          | C21 H25 N2 O4    |
|          | 369.1846   | -2.0 | -5.4 | 2.5  | 424.9 | 10.9         | C10 H25 N8 O7    |
|          | 369.1806   | 2.0  | 5.4  | -1.5 | 429.0 | 14.9         | C5 H25 N10 O9    |
|          | 369.1804   | 2.2  | 6.0  | 12.5 | 418.2 | 4.2          | C20 H22 N6 Na    |
|          | 369.1849   | -2.3 | -6.2 | -1.5 | 424.3 | 10.3         | C12 H30 N2 O9 Na |
|          | 369.1855   | -2.9 | -7.9 | 14.5 | 419.0 | 5.0          | C26 H25 O2       |
|          | 369.1862   | -3.6 | -9.8 | 3.5  | 423.0 | 9.0          | C13 H26 N6 O5 Na |
|          | 369.1790   | 3.6  | 9.8  | 7.5  | 416.9 | 2.8          | C19 H26 N2 O4 Na |

Figure S7. HRESIMS of compound 1

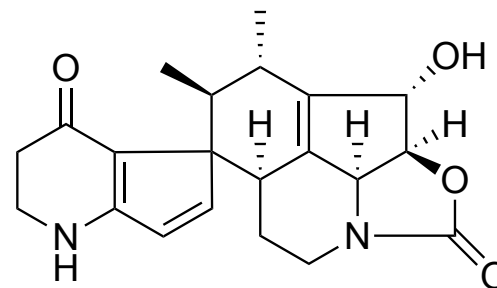

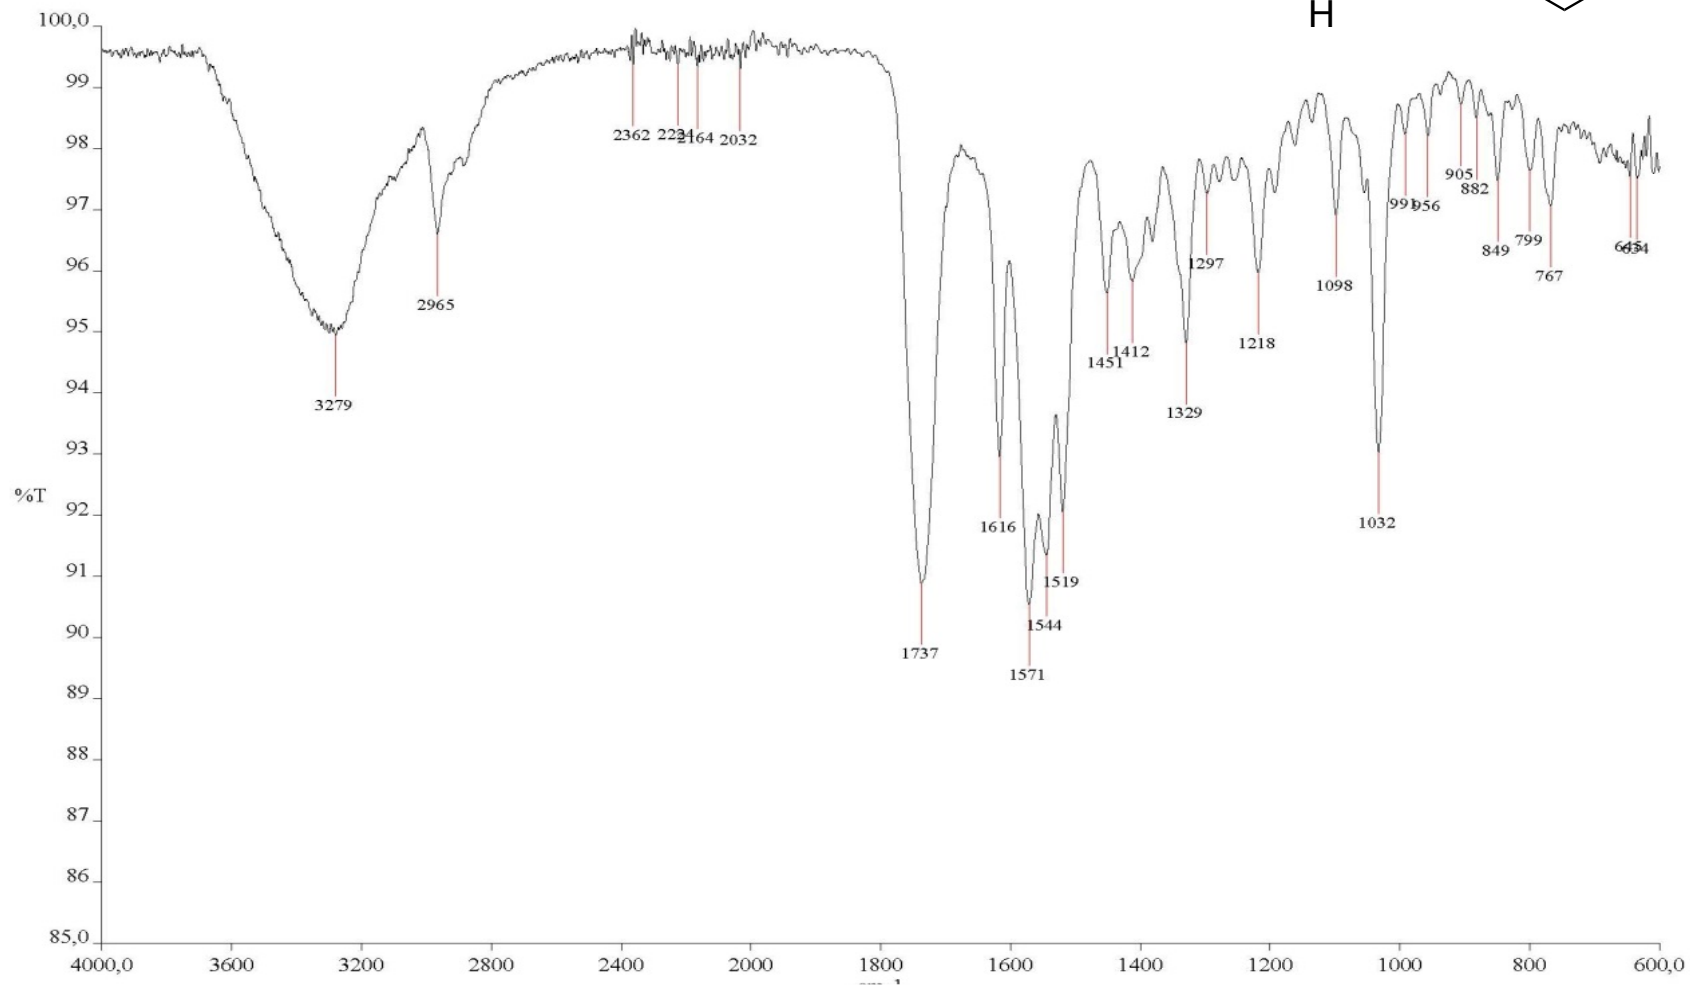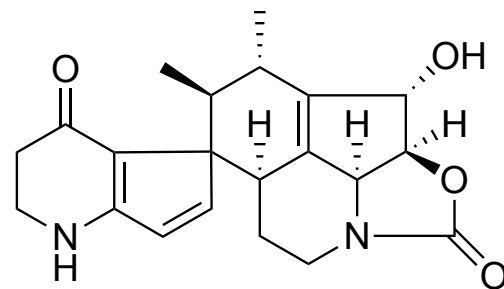

Figure S8. IR spectrum of compound 1
